# Supplementary material
Source: MDPI journal article supplement (https://www.mdpi.com/2076-3298/9/1/5)
Supplement: s1 [file s1]

## Supplementary Materials

Procedure for soil characterization by organic matter content, moisture and pH.

To determine organic carbon content, all samples were weighed and put in crucibles (Margesin & Schinner, 2005). Then, using the Nabertherm LOI Furnace, samples were heated to 550°C by 30 minutes, kept at 550°C for 3 hours and lowered to 105°C for 48 hours. Then all samples were weighed again. The organic carbon content was calculated using the following formula (Margesin & Schinner, 2005; Nelson, 1996):

$$\text{Organic carbon content [\%]} = \left( \frac{\text{Weight before heating} - \text{Weight after heating}}{\text{Weight before heating}} * 1.7 \right) * 100\% \quad (1)$$

To measure moisture content, all samples were weighted before air-drying. Then samples were placed in an oven at 105°C until a constant mass was achieved (Margesin & Schinner, 2005). Then the moisture content was measured using the following formula:

$$\text{Moisture content [\%]} = \frac{\text{Weight after air drying} - \text{Weight after oven drying (105°C)}}{\text{Weight after air drying}} * 100\% \quad (2)$$

To measure pH, a distilled water extraction was made and then measured using a portable pH meter.

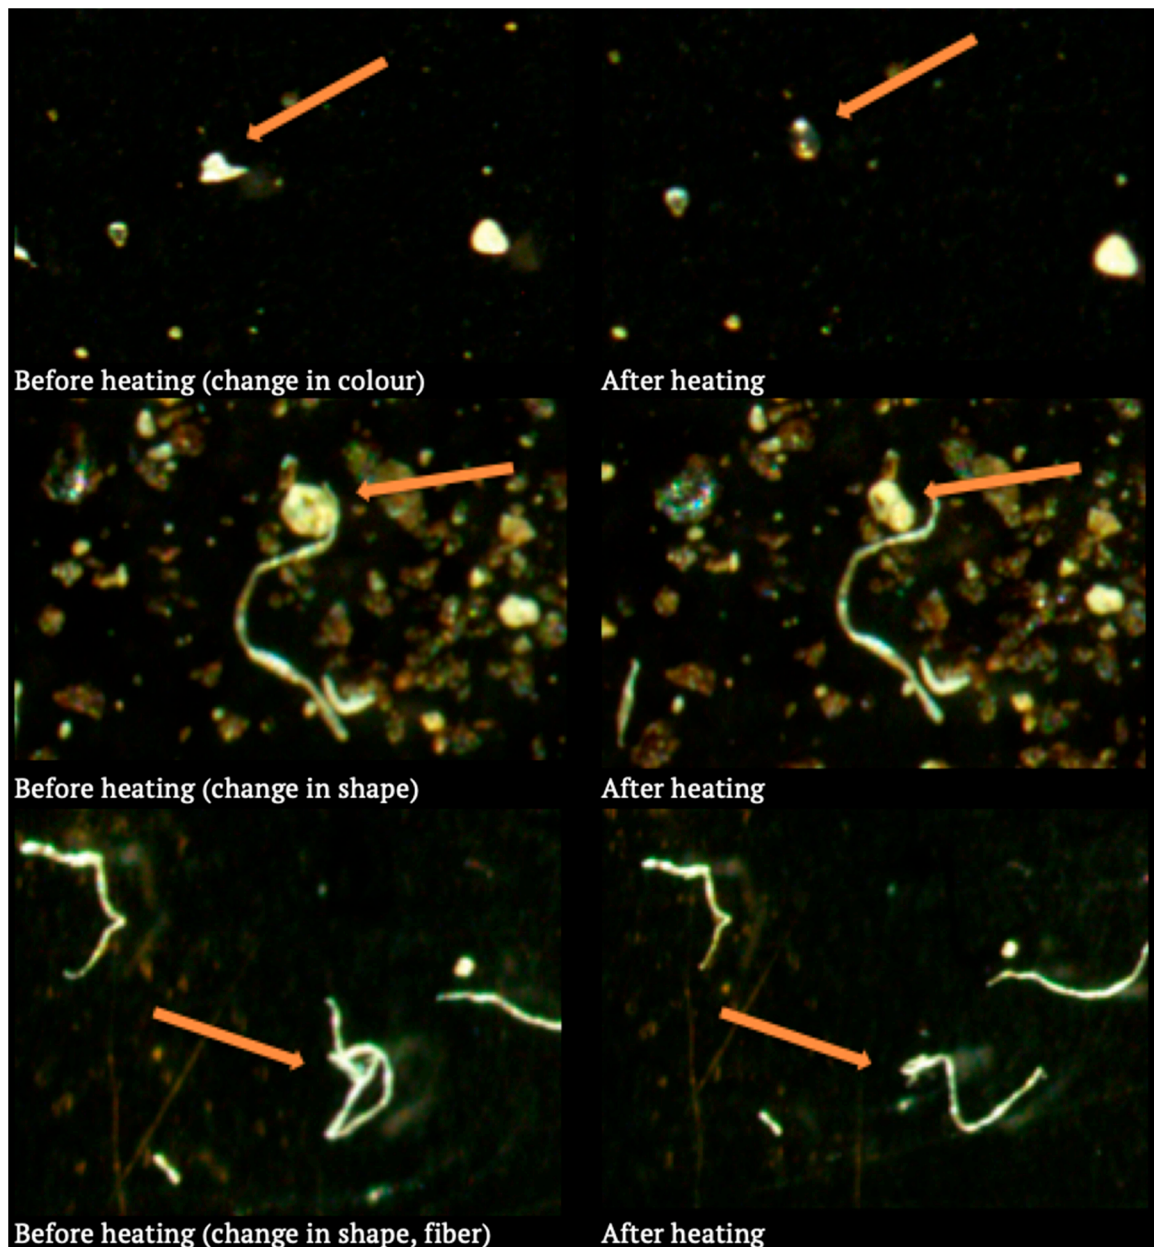

**Figure S1.** Pictures of plastic particles after and before heating (according to Zhang et al. 2018).

**Table S1.** Statistical data of microplastic particles per kg per city district in Amsterdam. No significant differences between city districts were observed after a Kruskal-Wallis test.

| City District   | n samples | Mean [MPs kg <sup>-1</sup> ] | Standard deviation [MPs kg <sup>-1</sup> ] | Median [MPs kg <sup>-1</sup> ] | Q1 [MPs kg <sup>-1</sup> ] | Q3 [MPs kg <sup>-1</sup> ] |
|-----------------|-----------|------------------------------|--------------------------------------------|--------------------------------|----------------------------|----------------------------|
| Amsterdamse Bos | 31        | 4237                         | 4704                                       | 2000                           | 1000                       | 5794                       |
| Nieuw-West      | 9         | 9378                         | 13,532                                     | 2000                           | 600                        | 17,600                     |
| Noord           | 3         | 2800                         | 1217                                       | 2200                           | 2100                       | 3200                       |
| Oost            | 4         | 9385                         | 10,658                                     | 5996                           | 3194                       | 12,187                     |
| West            | 6         | 4333                         | 3704                                       | 2800                           | 2050                       | 7450                       |
| Zuid            | 6         | 5230                         | 2714                                       | 4600                           | 3050                       | 6900                       |
| Zuid Oost       | 13        | 2337                         | 2879                                       | 1198                           | 600                        | 2395                       |

**Table S2.** Microplastic particles [MPP/Kg] per park or recreational area in Amsterdam, the Netherlands.

| Park or recreational area  | n samples | Mean [MPP/kg] | Standard deviation [MPP/Kg] | Median [MPP/K g] | Min [MPP/ Kg] | Max [MPP/ Kg] | Q1 [MPP/ Kg] | Q3 [MPP/ Kg] |
|----------------------------|-----------|---------------|-----------------------------|------------------|---------------|---------------|--------------|--------------|
| Amsterdamse Bos            | 31        | 4251.73       | 4763.03                     | 2000             | 200           | 19400         | 10485        | 5991         |
| Beatrixpark                | 3         | 3066.67       | 642.91                      | 2800             | 2600          | 3800          | 2700         | 3300         |
| Bijlmerweide               | 3         | 2861.33       | 3411.99                     | 1198             | 600           | 6786          | 899          | 3992         |
| Buiksloterbeek             | 1         | 2000          | -                           | 2000             | 2000          | 2000          | 2000         | 2000         |
| Darwinplantsoen            | 1         | 8000          | -                           | 8000             | 8000          | 8000          | 8000         | 8000         |
| De Hoge Dijk               | 2         | 1199          | 1.41                        | 1199             | 1198          | 1200          | 1198.5       | 1199.5       |
| Diemberbos                 | 2         | 1900          | 1838.48                     | 1900             | 600           | 3200          | 1250         | 2550         |
| Flevopark                  | 3         | 1024.73       | 12599.11                    | 3992             | 2000          | 24750         | 2996         | 14371        |
| Gaasperpark                | 2         | 1000          | 565.69                      | 1000             | 600           | 1400          | 800          | 1200         |
| Gaasperzoom                | 1         | 200           | -                           | 200              | 200           | 200           | 200          | 200          |
| Gerbrandypark              | 1         | 37,600        | -                           | 37,600           | 37,600        | 37,600        | 37,600       | 37,600       |
| Gijsbrecht van Aemstelpark | 1         | 9381          | -                           | 9381             | 9381          | 9381          | 9381         | 9381         |
| Leidsebosje                | 1         | 600           | -                           | 600              | 600           | 600           | 600          | 600          |
| Nelson Mandelapark         | 2         | 61975         | 5377.55                     | 61975            | 2395          | 10000         | 4296.25      | 8098.75      |
| Noorderpark                | 3         | 2200          | 2000                        | 2200             | 200           | 4200          | 1200         | 3200         |
| Oosterpark                 | 1         | 800           | -                           | 800              | 800           | 800           | 800          | 800          |
| Park de Kuil               | 3         | 2066.67       | 2203.03                     | 1000             | 600           | 4600          | 800          | 2800         |
| Rembrandtpark              | 2         | 9700          | 11172.29                    | 9700             | 1800          | 17600         | 5750         | 13650        |
| Sloterpark                 | 4         | 6400          | 11012.72                    | 1400             | 0             | 22800         | 0            | 7800         |
| Surinameplein              | 1         | 2800          | -                           | 2800             | 2800          | 2800          | 2800         | 2800         |
| Vondelpark                 | 2         | 6400          | 1414.21                     | 6400             | 5400          | 7400          | 5900         | 6900         |
| Wertheimpark               | 1         | 1796          | -                           | 1796             | 1796          | 1796          | 1796         | 1796         |
| Westerpark                 | 3         | 6933.33       | 3579.57                     | 9000             | 2800          | 9000          | 5900         | 9000         |

Semivariograms before and after fitting of microplastic concentration, organic carbon content, moisture content and pH in Amsterdam, the Netherlands

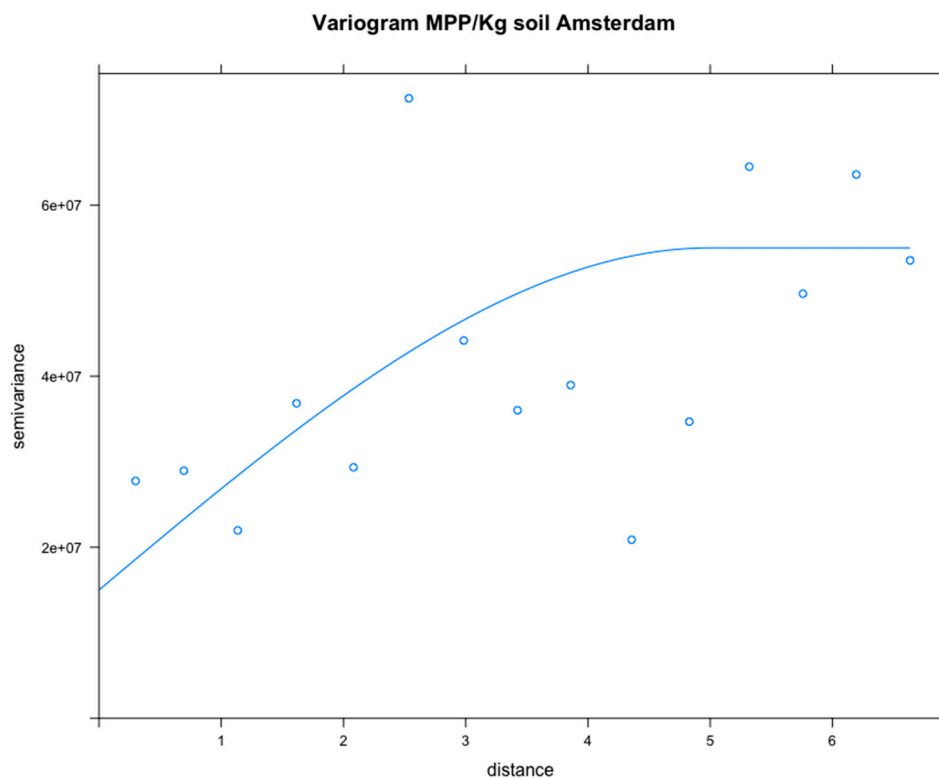

**Figure S2.** Variogram of MPP/Kg in Amsterdam, the Netherlands (not fitted).

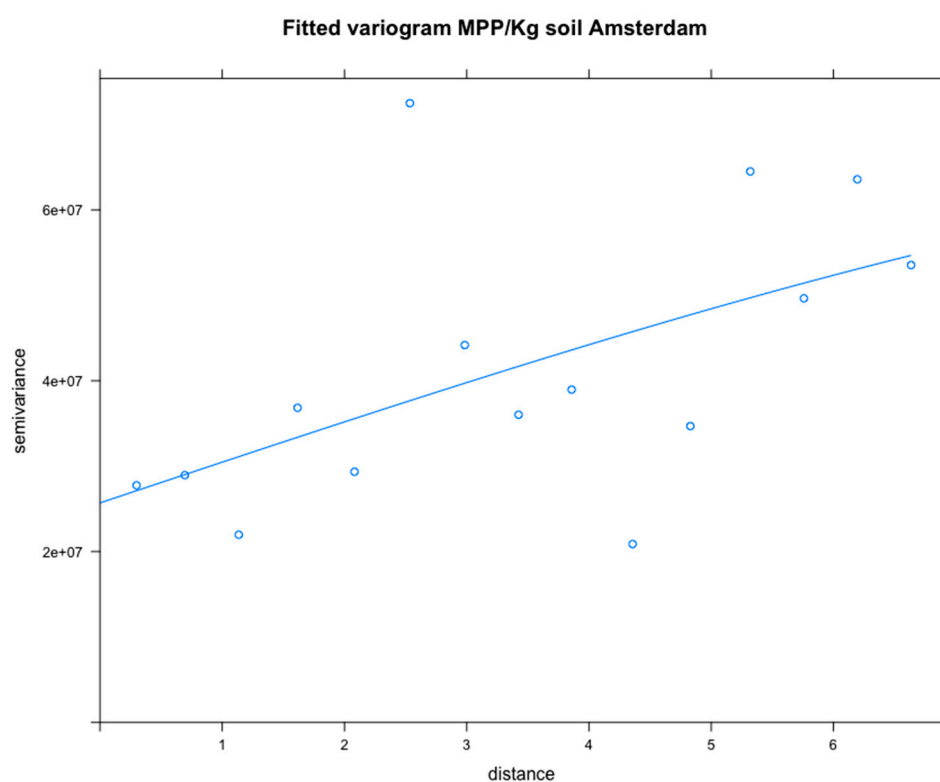

**Figure S3.** Fitted variogram of MPP/Kg in Amsterdam, the Netherlands.

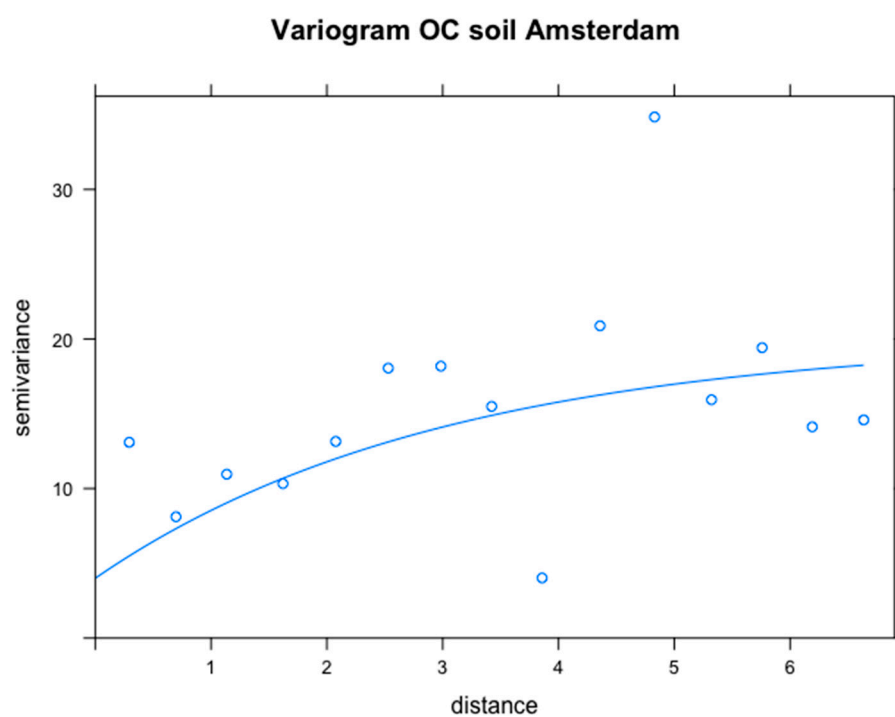

**Figure S4.** Variogram organic carbon content in Amsterdam, the Netherlands (before fitting).

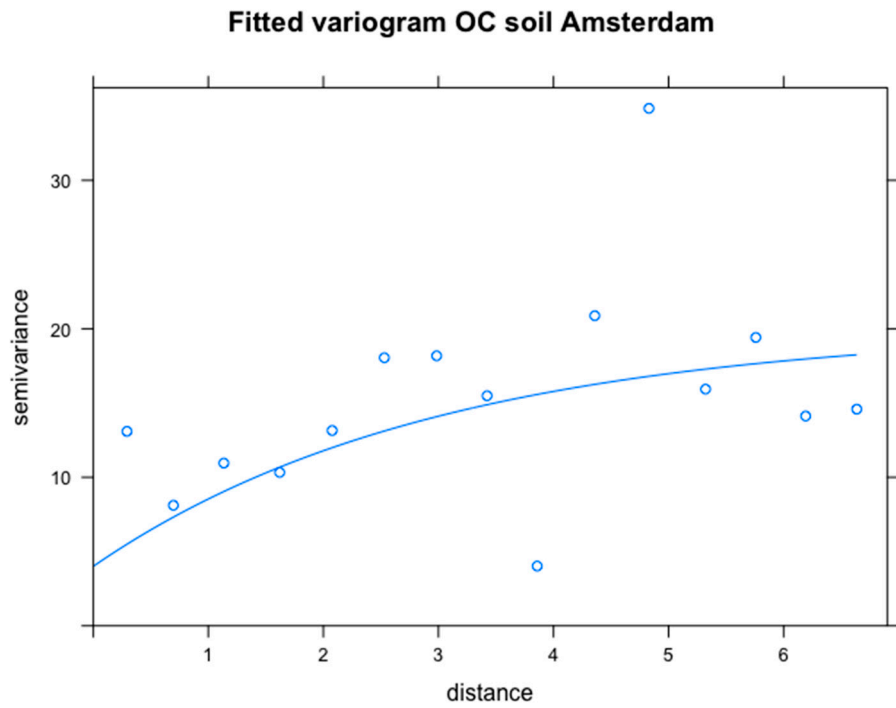

**Figure S5.** Fitted variogram organic carbon content in Amsterdam, the Netherlands.

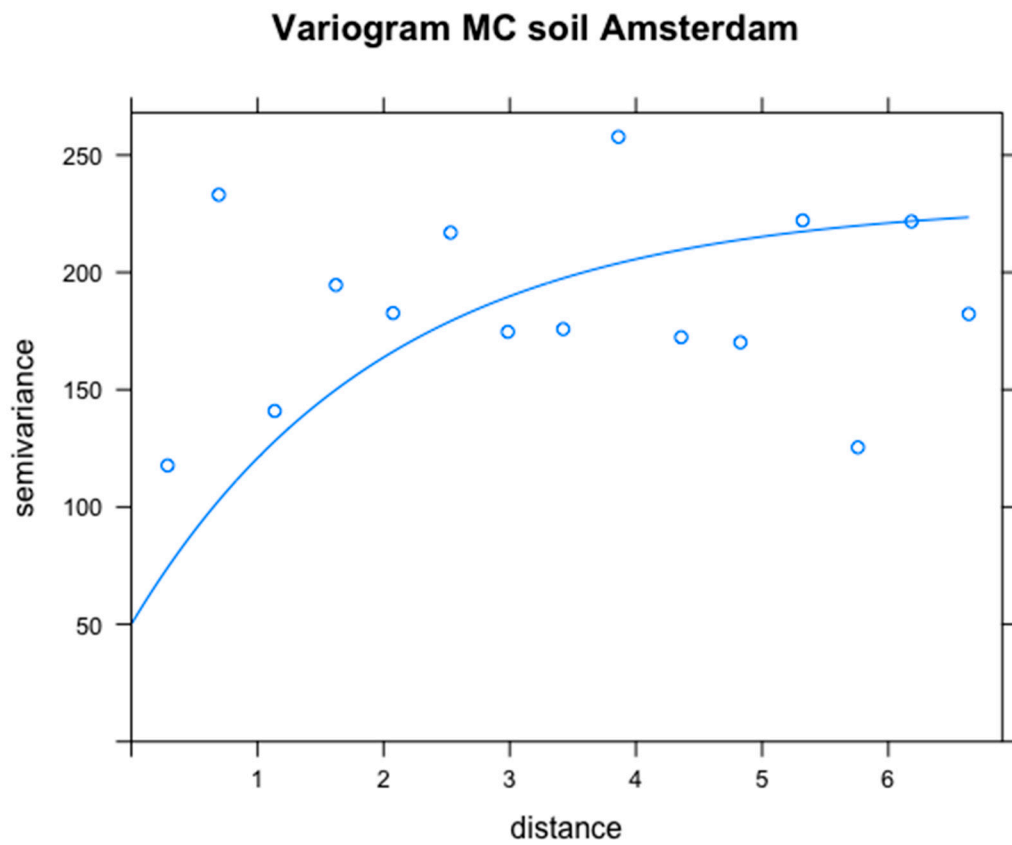

**Figure S6.** Variogram moisture content in Amsterdam, the Netherlands (before fitting).

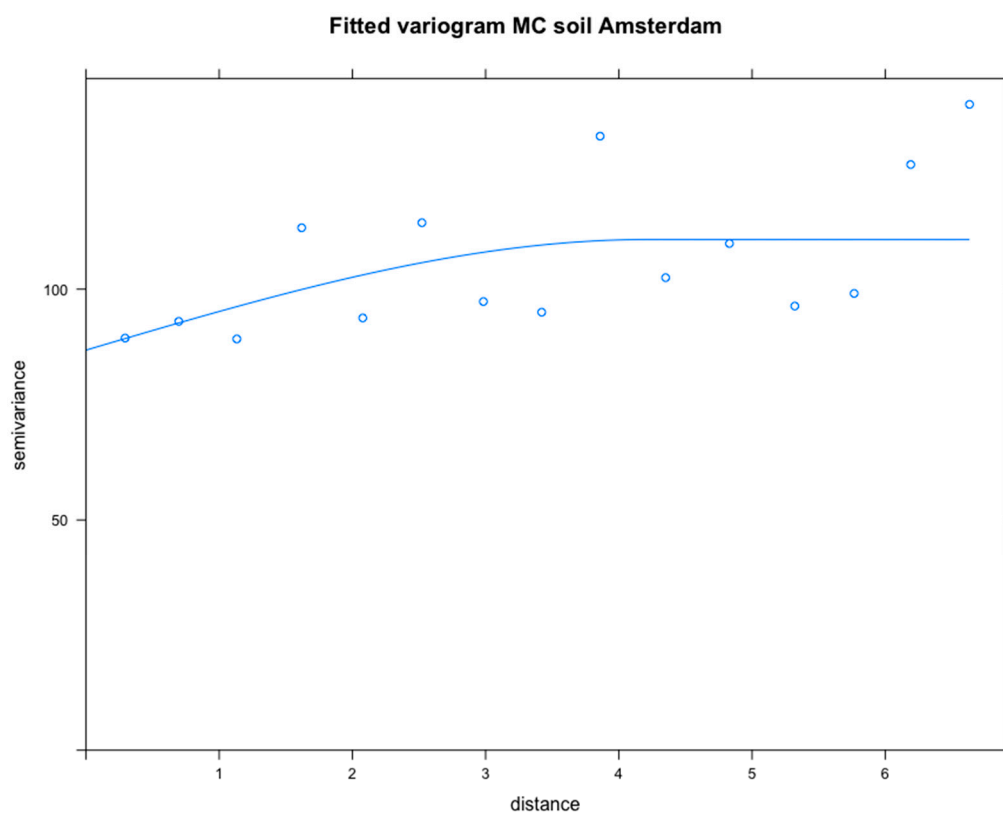

**Figure S7.** Fitted variogram of moisture content in Amsterdam, the Netherlands.

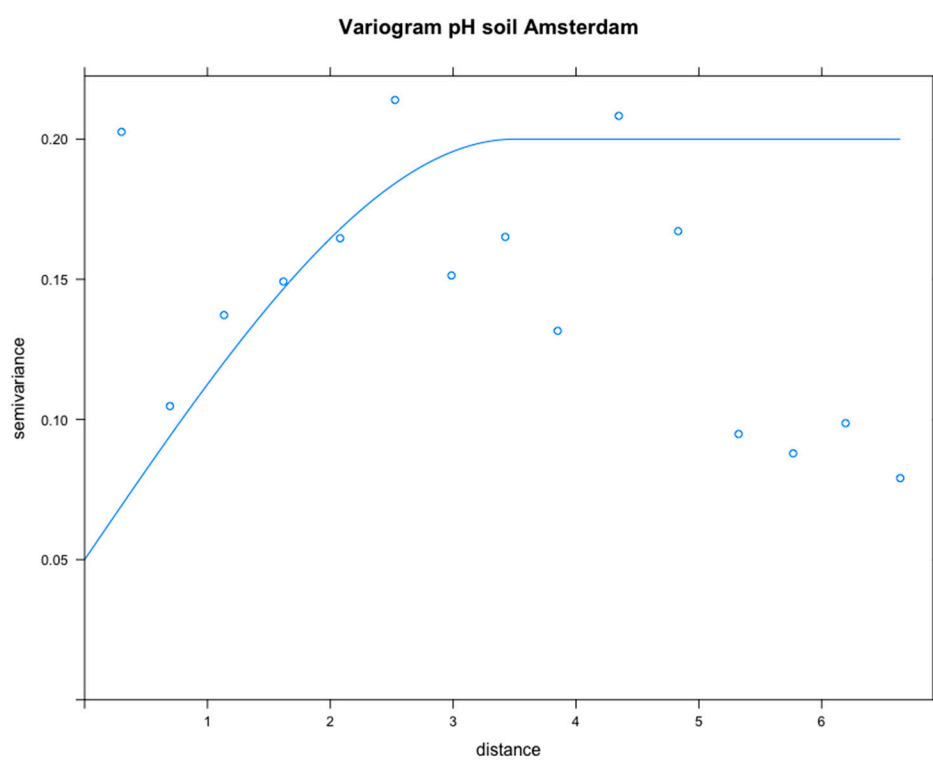

**Figure S8.** Variogram of pH in Amsterdam, the Netherlands (before fitting).

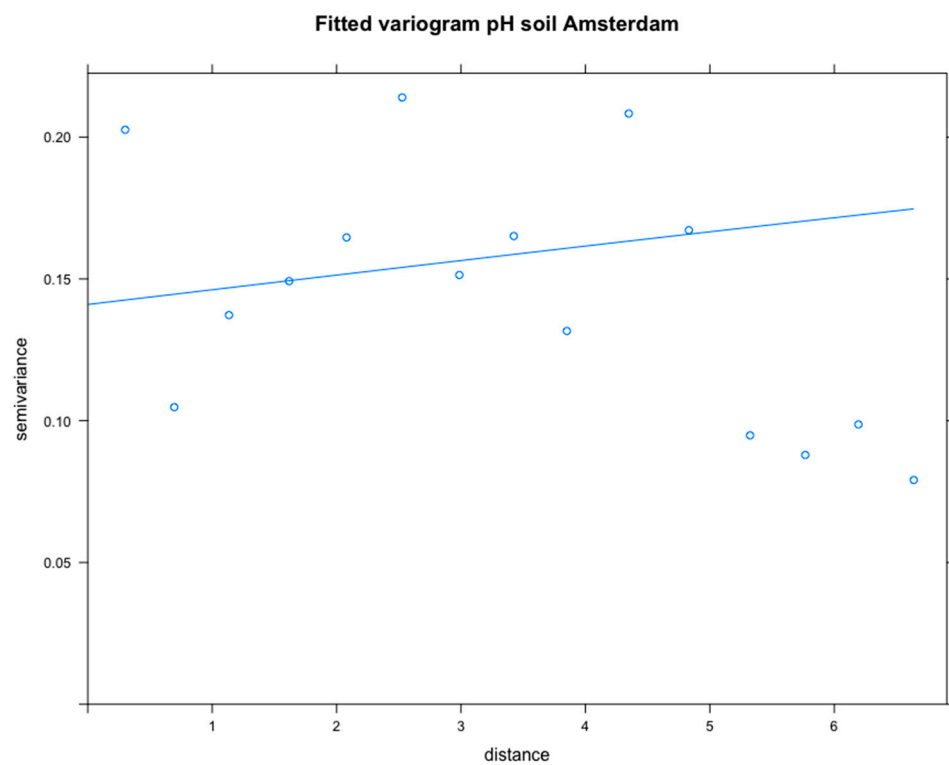

**Figure S9.** Fitted variogram of pH in Amsterdam, the Netherlands.
